# Supplementary material for: A Link Between Hypoglycemia and Progression of Atherosclerosis in the Veterans Affairs Diabetes Trial (VADT)
Source: Oxford University Press journal article supplement (doi:10.2337/dc15-2107), 2016-01-19
Supplement: dc152107supplementarydata.pdf [file dc152107supplementarydata.pdf]

**Supplementary Figure 1. Association of CAC Progression with Mean HbA1c during the study**

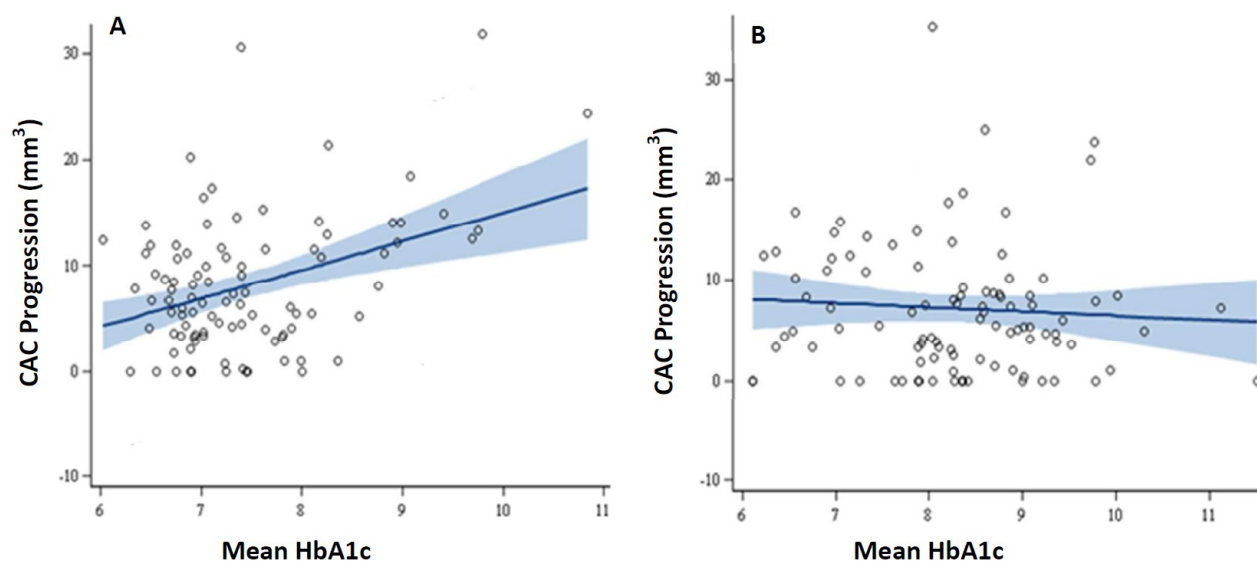

1A. Participants with serious hypoglycemia (n=97)

1B. Participants without serious hypoglycemia (n=100)

— Fit    95% Confidence Limits

## SUPPLEMENTARY DATA

### Supplementary Figure 2. Progression of CAC by treatment group in people with serious hypoglycemia matched by baseline CAC

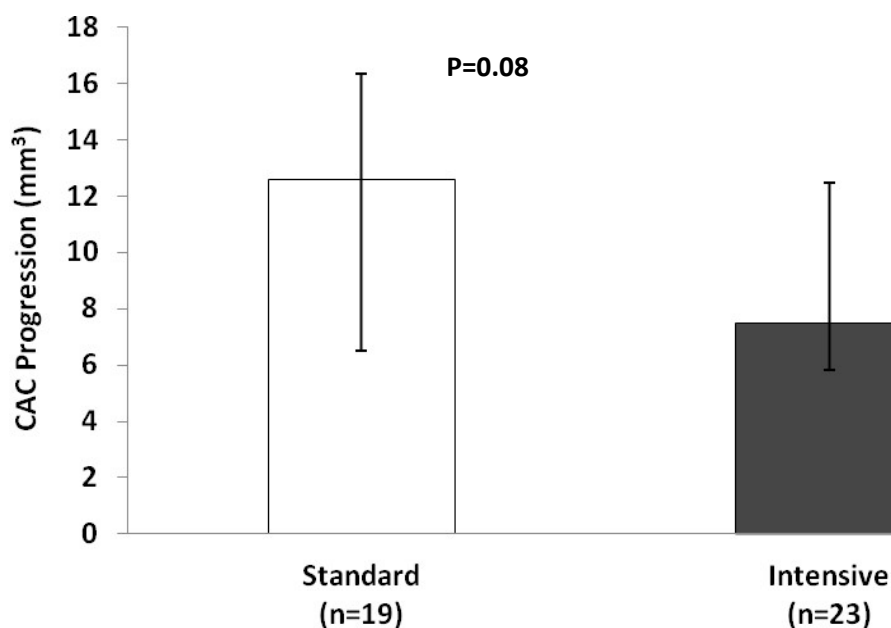

□ Standard treatment group ■ Intensive treatment group

Median extent of progression of CAC is shown. Error bars represent the 75<sup>th</sup> percentiles. Participants were matched within 10% of their baseline CAC scores. Number of participants: Standard treatment group=19; Intensive treatment =23.
